# Supplementary material
Source: Hindawi journal article supplement (doi:10.1155/2011/208634)
Supplement: f2 [file 208634.f2.pdf]

**Table III:** MS/MS data of the associated proteins with MT-3.

| Protein Name                                 | MW (Da) | xCorr | Peptide sequence   | Sequence |
|----------------------------------------------|---------|-------|--------------------|----------|
| Valosin containing protein                   | 89363.9 | 3.49  | DVDLEFLAK          |          |
|                                              |         | 3.32  | ELQELVQYPVEHPDKFLK |          |
|                                              |         | 3.28  | GILLYGPPGTGK       |          |
|                                              |         | 3.16  | GVLFGPPGCGK        |          |
|                                              |         | 3.07  | LDQLIYIPLPEK       |          |
|                                              |         | 2.81  | MDELQLFR           |          |
| Heat shock protein 84                        | 83281.2 | 4.51  | ADLINNLGTIAK       |          |
|                                              |         | 4.26  | ALLFIPR            |          |
|                                              |         | 4.04  | HLEINPDHPIVETLR    |          |
|                                              |         | 2.79  | IDIIPNPQER         |          |
|                                              |         | 2.4   | NPDDITQEEYGEFYK    |          |
|                                              |         | 2.34  | TLTLVDTGIGMTK      |          |
| HSP70<br>glucose regulated protein precursor | 72423   | 3.23  | DAGTIAGLNVMR       |          |
|                                              |         | 3.13  | TFAPEEISAMVLTK     |          |
|                                              |         | 1.94  | VTHAVVTVPAYFNDAQR  |          |
| HSP70 protein 8                              | 70871.1 | 3.65  | ARFEELNADLFR       |          |
|                                              |         | 3.17  | HWPFMVVNDAGRPK     |          |
|                                              |         | 2.93  | IINEPTAAAIA YGLDKK |          |
|                                              |         | 2.89  | LLQDFFNGK          |          |
|                                              |         | 2.48  | MKEIAEAYLGK        |          |
|                                              |         | 1.78  | MVNHFIAEFK         |          |
|                                              |         | 1.74  | NQVAMNPTNTVFDAGR   |          |

|                              |         |             |                            |          |
|------------------------------|---------|-------------|----------------------------|----------|
| DRP-2                        | 62      | 3.27        | AVGKDNFTLIPEGTNGTEER       |          |
|                              |         | 2.27        | DNFTLIPEGTNGTEER           |          |
|                              |         | 2.54        | KFPDFVYK                   |          |
|                              |         | 2.11        | QIGENLIVPGGVK              |          |
|                              |         | 3.1         | MVIPGGIDVHTR               |          |
|                              |         | 2.37        | VFNLYPR                    |          |
| DRP-3                        | 61936.3 | 5.51        | GMYDGPVFDLTTTPK            |          |
|                              |         | 3.76        | IMLEDGNLHVTQGAGR           |          |
| Pyruvate kinase              | 57844.9 | <b>3.23</b> | <b>DAVLNAWAEDVDLR</b>      |          |
|                              |         | <b>2.65</b> | <b>VFLAQKMMIGRCNR</b>      |          |
|                              |         | <b>1.57</b> | <b>VNLAMDVGK</b>           |          |
|                              |         | <b>0.82</b> | <b>VVPVP</b>               |          |
| ATP Synthase $\beta$ subunit | 56300.5 | 4.7         | <b>IPVGPETLGR</b>          |          |
|                              |         | 3.24        | TVLIMELINNVAK              |          |
|                              |         | 3.02        | <b>VALTGLTVAEYFR</b>       |          |
|                              |         | 2.69        | <b>VALVYQMNEPPGAR</b>      |          |
| Tubulin alpha 3              | 49959.5 | 2.9         | NLDIERPTYNLNR              |          |
|                              |         | 2.89        | TIQFVDWCPTGFK              |          |
| $\gamma$ -Enolase            | 47296.7 | 3.79        | ACNCLLLK                   | Specific |
|                              |         | 2.94        | DGKYDLDFK                  | Specific |
|                              |         | 2.89        | DLPLYR                     | Specific |
|                              |         | 2.5         | <b>GNPTVEVDLYTAK</b>       |          |
|                              |         | 2.42        | IEEELGDAR                  | Specific |
|                              |         | 2.04        | YDLDFK                     |          |
| $\alpha$ -Enolase            | 47124.8 | 4.72        | <b>DATNVGDEGGFAPNILENK</b> | Specific |

|                                  |         |      |                          |           |
|----------------------------------|---------|------|--------------------------|-----------|
|                                  |         | 2.11 | EAELELLK                 | Specific  |
|                                  |         | 2.78 | <b>GNPTVEVDLYTAK</b>     |           |
|                                  |         |      | YDLDFK                   |           |
|                                  |         |      | <b>YITPDQLADLYK</b>      |           |
| β-Tubulin                        | 47046.7 | 3.77 | ALTVPELTQPMFNSK          |           |
|                                  |         |      | ESESCDCLQGFQLTHLLGGG     |           |
|                                  |         | 1.54 | TGSGMGTLILLISKIR         |           |
|                                  |         | 1.58 | LAVNMVFPFR               |           |
| Creatine Kinase BB               | 42713.3 | 3.7  | <b>DLFDPIIEER</b>        |           |
|                                  |         | 3.32 | <b>FCTGLTQIETLFK</b>     |           |
|                                  |         | 3.03 | LEQGQAIDDLMPAQK          |           |
|                                  |         | 2.9  | <b>VLTPELYAELR</b>       |           |
|                                  |         | 2.87 | <b>LLIEMEQR</b>          |           |
| β-Actin                          | 41736.7 | 4.71 | <b>AGFAGDDAPR</b>        |           |
|                                  |         | 3.07 | DLTDYLMK                 |           |
|                                  |         | 2.6  | GILTLK                   |           |
|                                  |         | 1.83 | <b>VAPEEHPVLLTEAPLNP</b> |           |
| Aldolase 3 ( <b>Brain type</b> ) | 39394.9 | 3.64 | DDNGVPFVR                | Specific  |
|                                  |         | 3.54 | DNAGAATEEFIK             | Specific  |
| Aldolase 1                       | 39355.6 | 2.1  | <b>ADDGRPFQVIK</b>       | Specific  |
|                                  |         | 2.18 | CAQYKKDGADFAK            | In Aldo_3 |
|                                  |         | 2.06 | QLLLTADDR                | specific  |
| Malate dehydrogenase             | 35611.4 | 3.97 | <b>GCDVVVIPAGVPR</b>     |           |
|                                  |         | 3.44 | <b>IFGVTTLDIVR</b>       |           |
|                                  |         | 2.83 | <b>VDFPQDQLATLTGR</b>    |           |

|             |         |      |                     |  |
|-------------|---------|------|---------------------|--|
| 14-3-3 zeta | 27771.1 | 3.66 | VFYLK               |  |
|             |         | 3.32 | <b>YLAEVAAGDDK</b>  |  |
|             |         | 3.18 | <b>YLAEVAAGDDKK</b> |  |
